# Supplementary material for: Cold-Dependent Expression and Alternative Splicing of Arabidopsis Long Non-coding RNAs
Source: PubMed Central journal article supplement (PMC6413719; doi:10.3389/fpls.2019.00235), 2019-02-28
Supplement: Data_Sheet_1.pdf [file Data_Sheet_1.pdf]

*Supplementary Figures*

**Cold-Dependent Expression and Alternative Splicing of Arabidopsis  
Long Non-Coding RNAs**

**Cristiane P. G. Calixto, Nikoleta A. Tzioutziou, Allan B. James, Csaba Hornyik, Wenbin Guo,  
Runxuan Zhang, Hugh G. Nimmo and John W. S. Brown\***

\* Correspondence: [j.w.s.brown@dundee.ac.uk](mailto:j.w.s.brown@dundee.ac.uk)

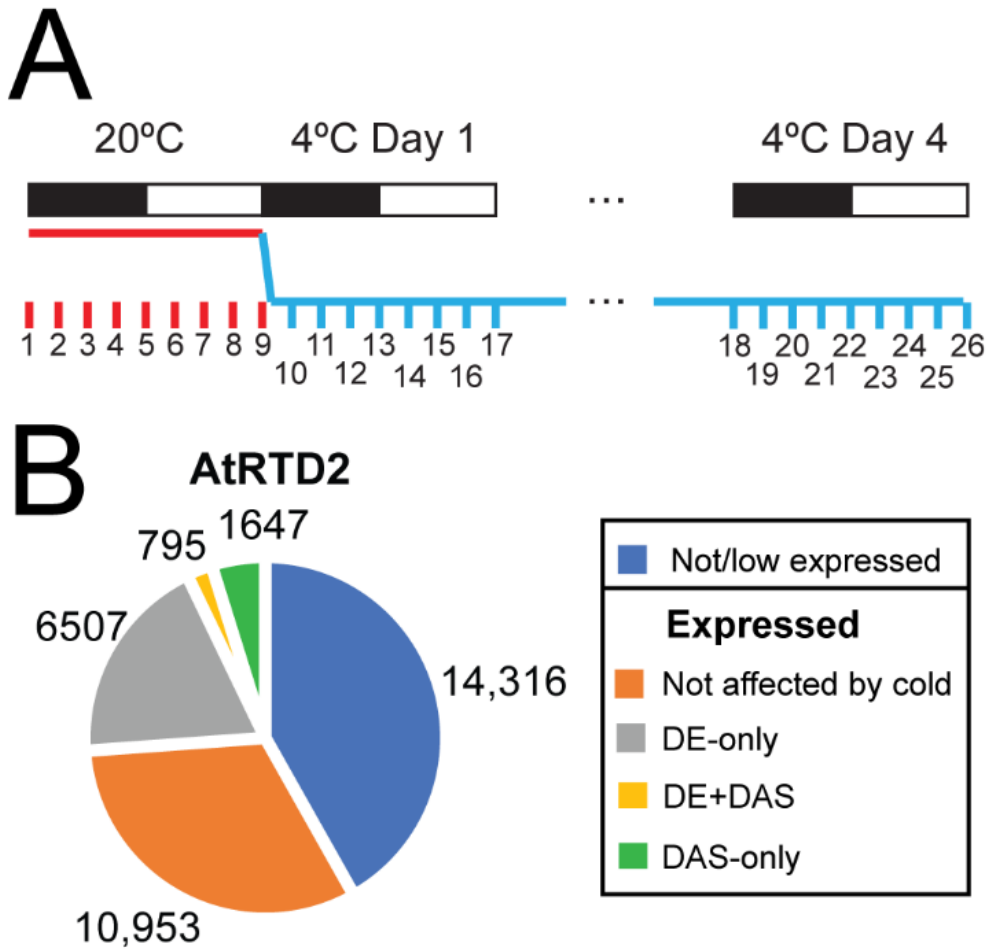

**Supplementary Figure S1. RNA-seq time-course analysis of the Arabidopsis response to low temperature in diel conditions from Calixto et al. (2018).** (A) Sampling strategy. Time-points of sampling are marked by vertical coloured lines and labelled from 1 to 26. Five-week-old Arabidopsis rosettes were harvested every 3 h over a 24 h-period at 20°C (red lines). At dusk, the temperature was gradually reduced to 4°C (blue lines), and harvesting continued during the first day at 4°C and the fourth day at 4°C. Black boxes, 12 h dark; white boxes, 12 h light. (B) Number of AtRTD2 genes not/low expressed, expressed but not significantly affected by the cold treatment, differentially expressed (DE) and/or differentially alternatively spliced (DAS) [results are redrawn from Calixto et al. (2018)].

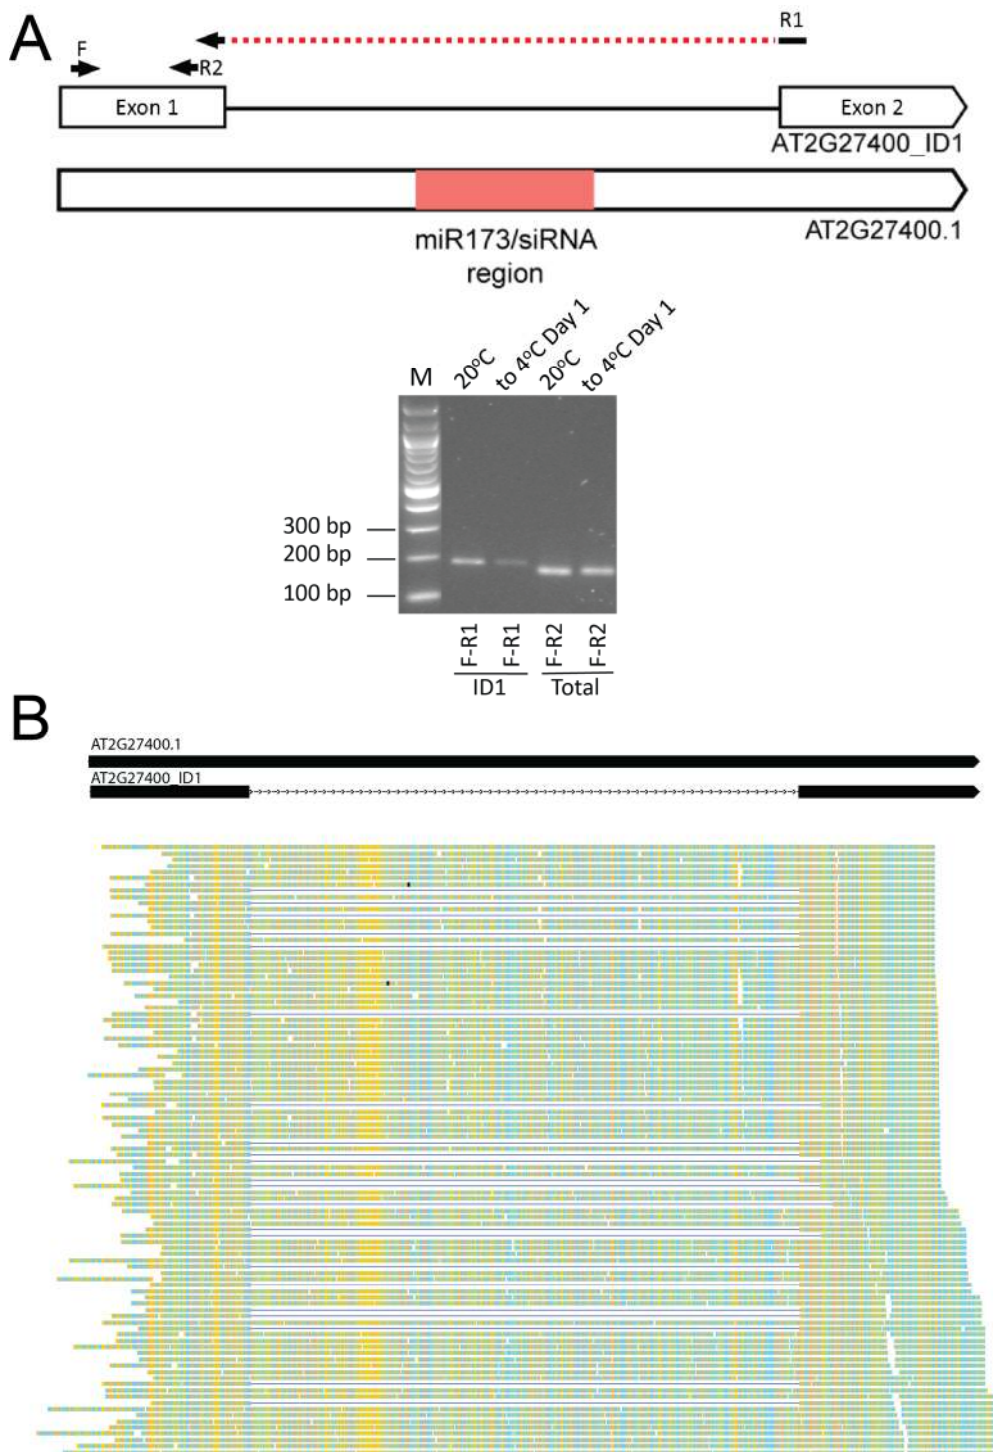

**Supplementary Figure S2. Transcript isoforms of *TAS1a* (AT2G27400).** (A) Detection of the spliced transcript isoform, AT2G27400\_ID1 using RT-PCR. RNA from samples harvested at dawn on the last day at 20°C and on the first day at 4°C were used for the analysis. The same forward primer (F) was used in all reactions; R1 spanned the exon 1-exon 2 splice junction and was specific to the spliced isoform, AT2G27400\_ID1, while R2 detected both the unspliced and spliced transcripts. PCR product sizes were predicted to be 168 and 146 bp for AT2G27400\_ID1 and both transcripts, respectively. Amplicons were co-electrophoresed with 100 bp markers (M) (New England BioLabs) on a 1.5% (0.5x TBE) agarose gel. F = Forward primer, R = Reverse primer. (B) Alignment of RNA-seq reads covering the whole length of the gene using IGB (Nicol et al., 2009) with schematic diagrams of the two transcripts; reads supporting the splicing of the intron (blue lines).

A

AT1G50055.1

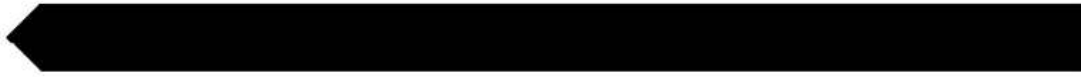

B

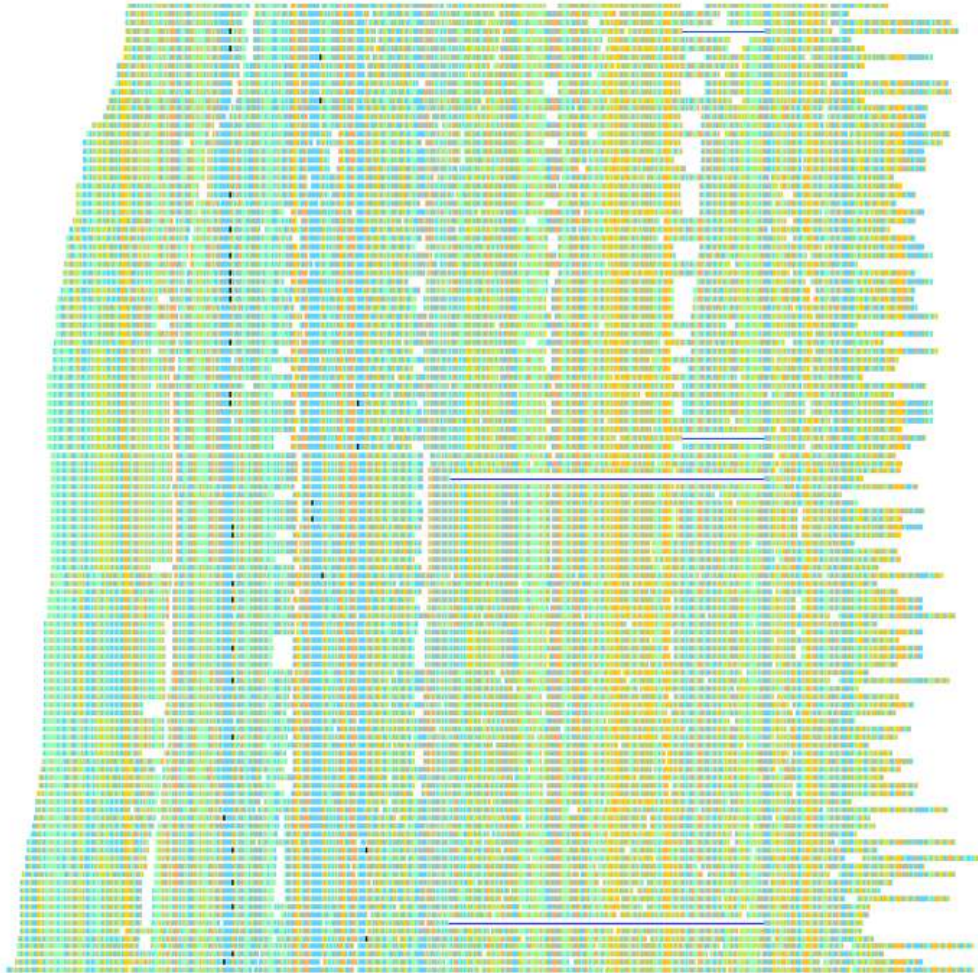

**Supplementary Figure S3. Transcript of *TAS1b* (AT1G50055).** (A) AT1G50055 is a single exon gene in AtRTD2. (B) Alignment of RNA-seq reads covering the whole length of the gene using IGB (Nicol et al., 2009).



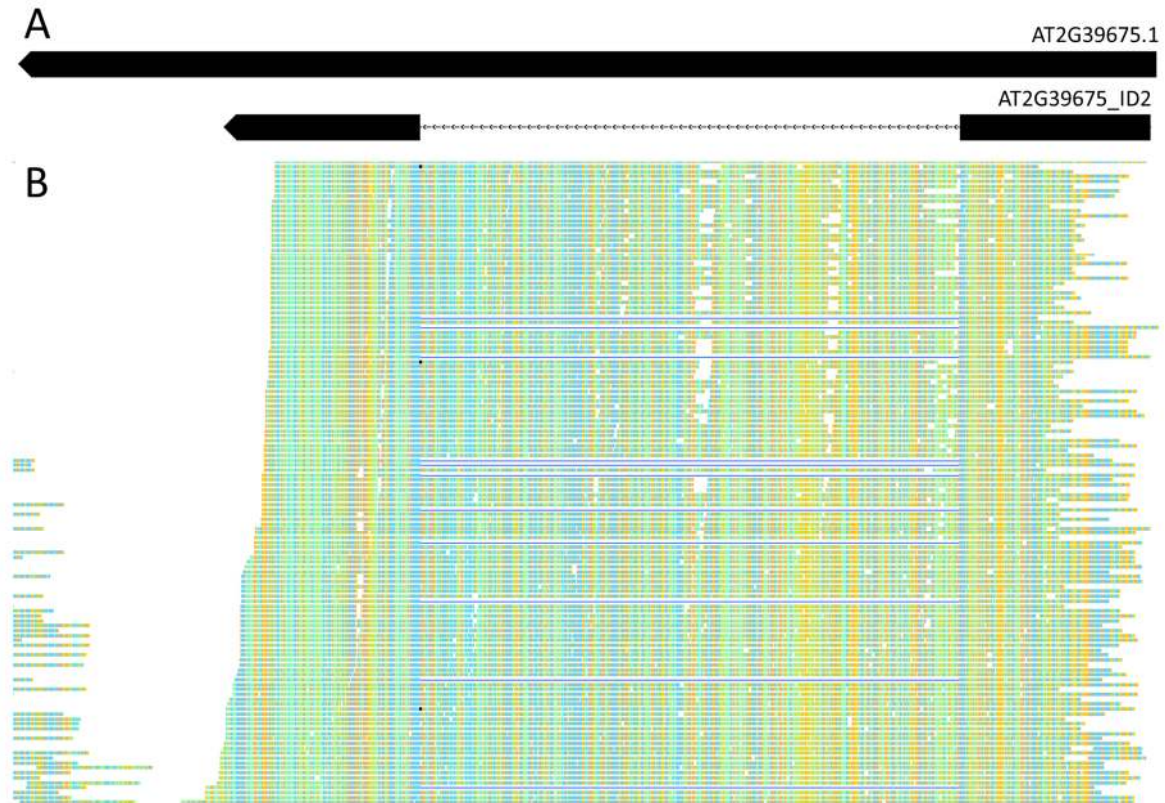

**Supplementary Figure S4. Transcript isoforms of *TAS1c* (AT2G39675).** (A) AT2G39675 has two different alternative isoforms: AT2G39675.1 which retains the intron and AT2G39675\_ID2 which splices the intron out. (B) Alignment of RNA-seq reads covering the whole length of the gene using IGB (Nicol et al., 2009); reads supporting the splicing of the intron (blue lines).

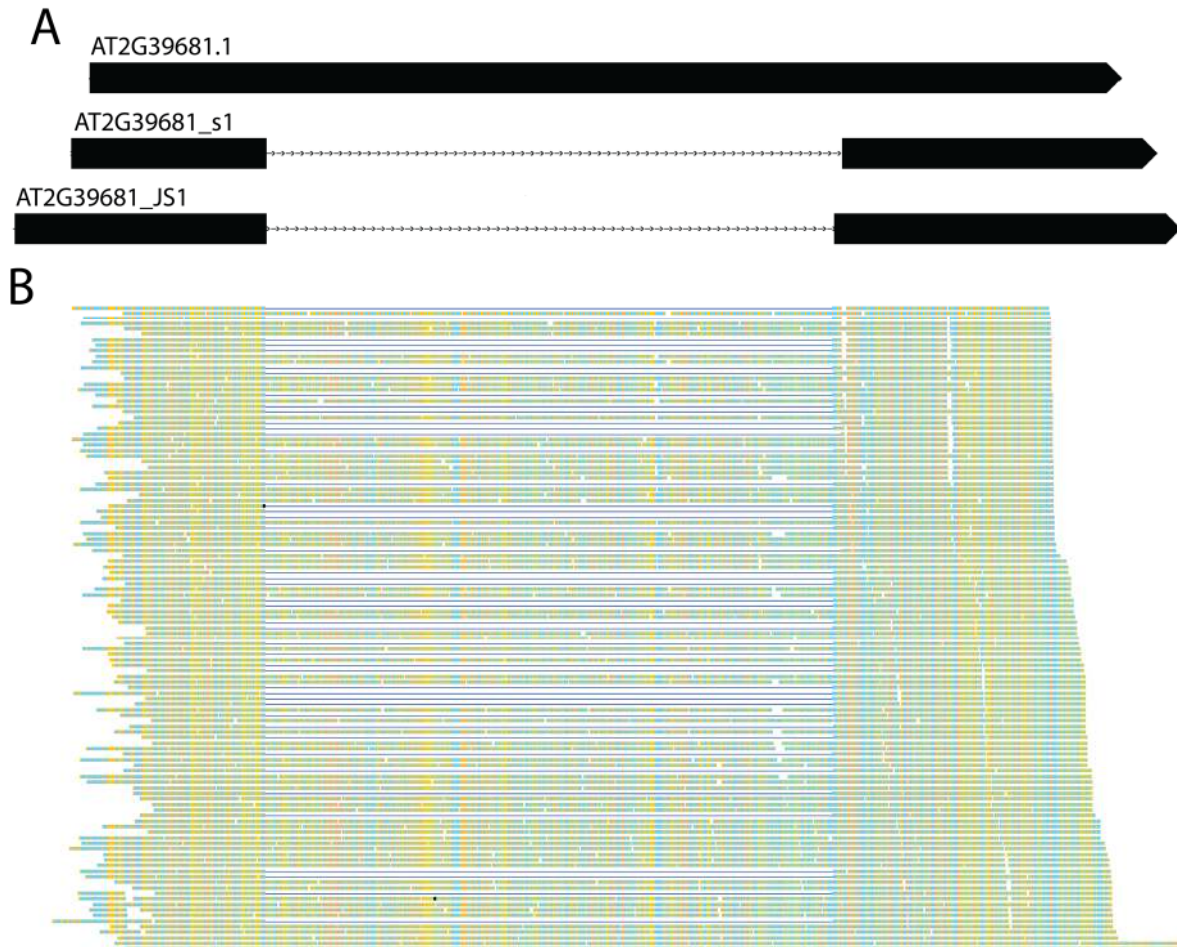

**Supplementary Figure S5. Transcript isoforms of *TAS2* (AT2G39681).** (A) AT2G39681 has three different alternative isoforms: AT2G39681.1 which retains the whole intron, AT2G39681\_JS1 and AT2G39681\_s1 which splice out the intron. AT2G39681\_JS1 and AT2G39681\_s1 differ by an alternative 3' splice site in Exon 2. (B) Alignment of RNA-seq reads covering the whole length of the gene using IGB (Nicol et al., 2009); reads supporting the splicing of the intron (blue lines).

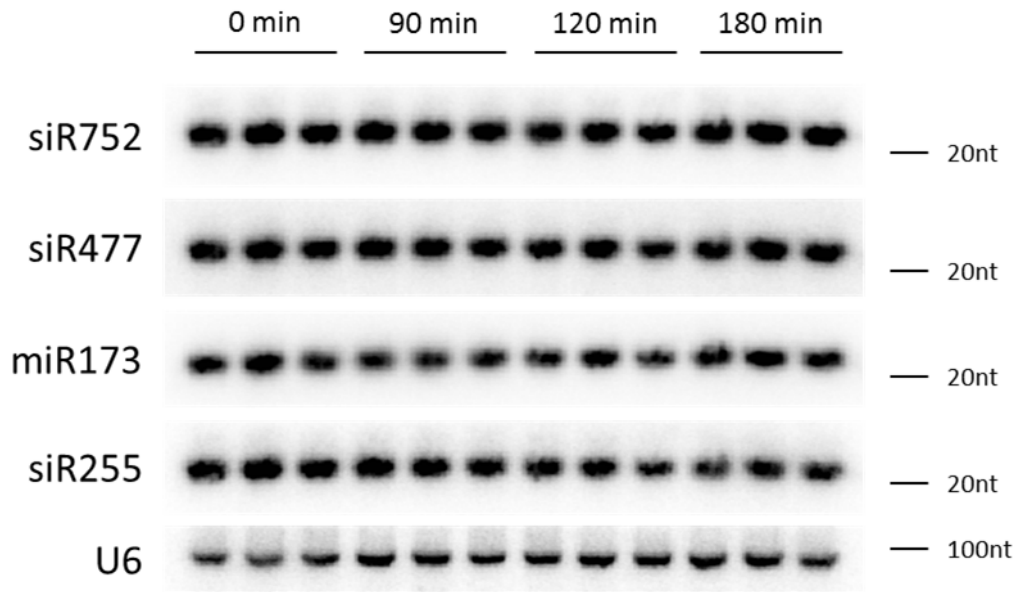

**Supplementary Figure S6. Small RNA blot of expression of miR173 and phasiRNAs.**

Total RNA from three replicates of four time-points at and after decreasing temperature (see text for details) was hybridised with different probes to detect miR173, three siRNAs (siR752, siR477 and siR255) and the U6snRNA loading control.

**Reference**

- Calixto, C.P.G., Guo, W., James, A.B., Tzioutziou, N.A., Entizne, J.C., Panter, P.E., Knight, H., Nimmo, H.G., Zhang, R., and Brown, J.W.S. (2018). Rapid and dynamic alternative splicing impacts the Arabidopsis cold response transcriptome. *Plant Cell* 30, 1424-1444.
- Nicol, J.W., Helt, G.A., Blanchard, S.G.J., Raja, A., and Loraine, A.E. (2009). The Integrated Genome Browser: free software for distribution and exploration of genome-scale datasets. *Bioinformatics* 25, 2730-2731.
